# Supplementary material
Source: PubMed Central journal article supplement (PMC3031717)
Supplement: NIHMS258936-supplement-01.pdf [file NIHMS258936-supplement-01.pdf]

## **SUPPLEMENTAL DATA**

***E. coli* derived Von Willebrand Factor-A2 domain FRET proteins that quantify ADAMTS13 activity**

Kannayakanahalli M. Dayananda, Shobhit Gogia and Sriram Neelamegham

### **Table of Content**

Supplemental Tables 1

Supplemental Figures S1 – S4

**Supplemental Table 1**

| <b>Name of the primer</b> | <b>Primer sequence (5'-3') *</b>                 | <b>Use</b>                                                                                                                |
|---------------------------|--------------------------------------------------|---------------------------------------------------------------------------------------------------------------------------|
| FP1_AgeI sense            | GGGCGG <u>ACCGGT</u> ATGGTGAGCAAGGGCGAGGAGCTG    | Citrine into pCSCG-A2-FH                                                                                                  |
| FP1_AgeI antisense        | CGCGCC <u>ACCGGT</u> CTTGTACAGCTCGTCCATGCCGAG    |                                                                                                                           |
| His7STOPHind3_Rev         | CGCGCGCA <u>AAGCTT</u> AATGGTGATGGTGATGGTGATGGCC | Citrine-A2 from pCS-CG into pRSETB                                                                                        |
| NdeI_Citrine_For          | GCGGCGGC <u>CATATG</u> TGAGCAAGGGCGAGGAGCTG      | Citrine-A2 from pCS-CG into pRSETB, Venus into pRSET-Citrine-A2-FH                                                        |
| FP2_AgeI antisense        | CGCGCACCGGTCTCGTCCATGCCGAGAGTGATCCC              | Venus into pRSET-Citrine-A2-FH                                                                                            |
| FP1_HpaI sense            | [Phos] <u>AACAT</u> GGTGAGCAAGGGCGAGGAGCTG       | Cerulean into pRSET-Ven-A2-FH                                                                                             |
| FP1_BstBI antisense       | CCGCCG <u>TTCGAA</u> CTTGTACAGCTCGTCCATGCCG      |                                                                                                                           |
| AgeIVWF1594For            | GTGTGT <u>ACCGGT</u> CAGGGTGATCGGGAGCAGGGCGCC    | A2 (XS-VWF) forward primer                                                                                                |
| AgeIVWF1558For            | CGTAGT <u>ACCGGT</u> AAAGGGGACATCCTGCAGCGGG      | A2 (S-VWF) forward primer                                                                                                 |
| AgeIVWF1530For            | CGCGCG <u>ACCGGT</u> GTTGGCCAGGACAGCATCCACG      | A2 (M-VWF) forward primer                                                                                                 |
| AgeIVWF1496For            | GGGATT <u>ACCGGT</u> GTTCTGGATGTGGCGTTCGTC       | A2 (L-VWF) forward primer                                                                                                 |
| HpaIVWF1670Rev            | [Phos] <u>AACGCAGC</u> ACCTCTGCAGCACCAGG         | Reverse primer for all of the above A2-FRET conststructs                                                                  |
| VWFNdeI1481F              | GCGCGCG <u>CATATG</u> GGGCTCTTGGGGGTTTCGACCCTG   | For making pRSET-A2-Cer-H<br><sup>1605</sup> Y- <sup>1606</sup> M to <sup>1605</sup> A- <sup>1606</sup> A mutation primer |
| VWFHpaI1668R              | [Phos] <u>AACCCT</u> TCTGCAGCACCAGGTCAGGAGC      |                                                                                                                           |
| VWF_YM1605_6AA_rev        | GATTTCCCGTGACAGCAGCGACCAGGTTG                    |                                                                                                                           |

\* **Restriction enzyme sites:** GTTAAC: *HpaI*; [Phos]ACC: *HpaI* compatible end; ACCGGT: *AgeI*; CATATG: *NdeI*; AAGCTT: *HindIII*; TTCGAA: *BstBI*

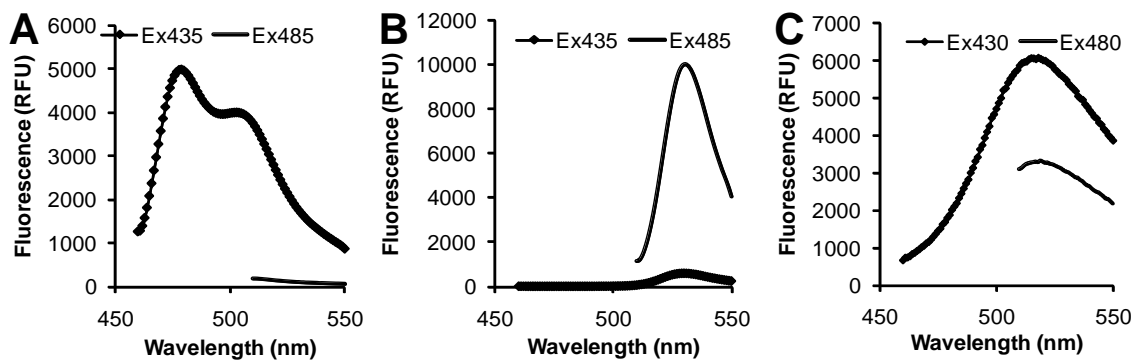

**Supplemental Fig. S1 Emission spectra** of **A.** VWF-A2(1481-1668)-Cerulean, **B.** Venus-VWF-A2(1481-1668) and **C.** Citrine-VWF-A2(1481-1668). Excitation wavelengths of 435 nm and 485nm are optimum for CFP and YFP respectively. Proteins in panels A and B were expressed in *E. coli* BL21 Star. Protein in panel C was from *E. coli* Rosetta-gami 2(DE3)pLysS. Spectra for Citrine-VWF-A2(1481-1668) does not match prior reports in literature [1].

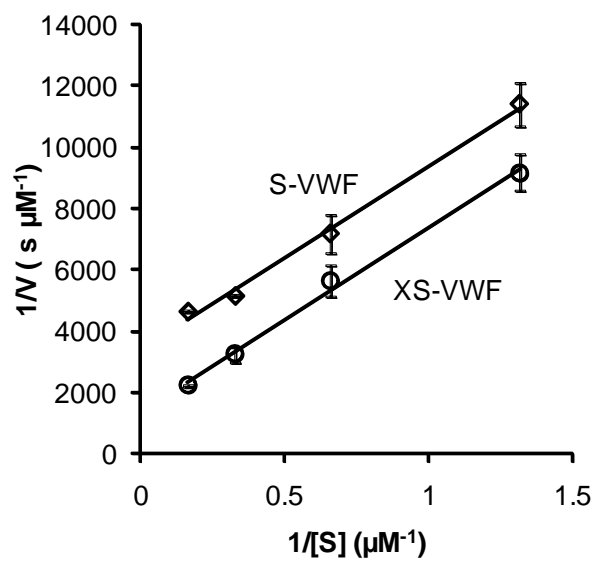

**Supplemental Fig. S2 Enzyme kinetics.** Various concentrations of XS-VWF and S-VWF were incubated with 20% plasma from normal human donors for up to 2h. FRET ratio measured at various times was used to generate Lineweaver-Burk plot.

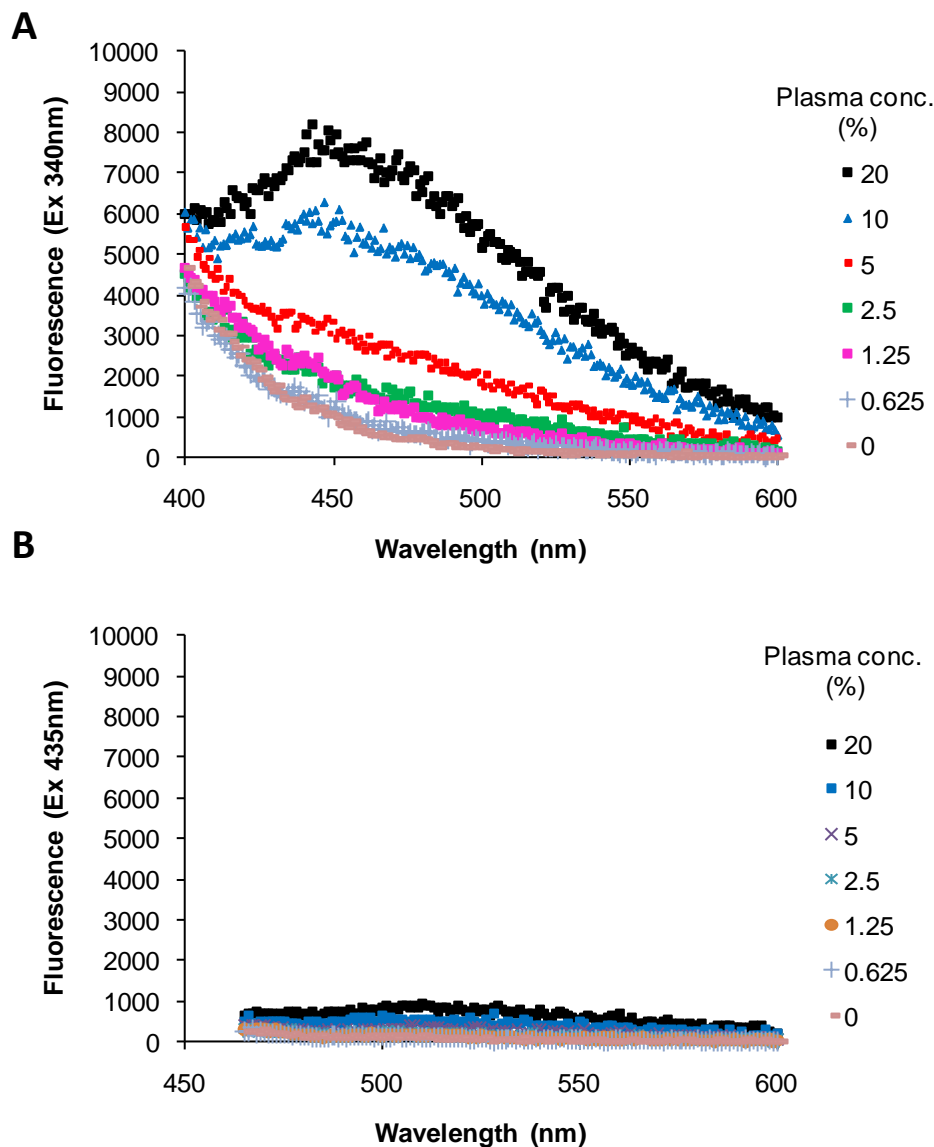

**Supplemental Fig. S3 Plasma auto-fluorescence.** Human blood plasma at various dilutions (20-0% of normal levels) was excited at either 340nm (conditions used in the VWF-FRETS73 assay, panel A) or 435nm (conditions of the XS-VWF assay, panel B). Emission spectra were collected using identical instrument settings. As seen, auto-fluorescence due to plasma proteins is higher when using lower excitation wavelengths (panel A).

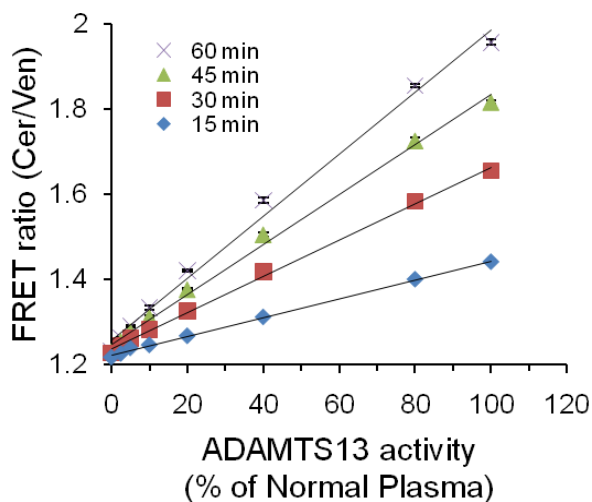

**Supplemental Fig. S4 Measurement of low ADAMTS-13 activity.** Plasma was obtained from normal human blood (100% ADAMTS13 activity). A portion of this was heat-inactivated to obtain 0% ADAMTS13 activity plasma. Normal plasma and heat-inactivated plasma were then mixed to obtain samples with a variety of ADAMTS13 activities. For example, 40% ADAMTS13 activity plasma was obtained by mixing normal plasma and heat-inactivated plasma in 4:6 proportion. Following this, 20 $\mu$ L of the plasma samples with a variety of enzyme activities were mixed with 2 $\mu$ M XS-VWF in 100 $\mu$ L reaction volume. XS-VWF cleavage was measured at various times. 10% ADAMTS13 activity was detected at 30 min.

#### References:

[1] A.A. Heikal, S.T. Hess, G.S. Baird, R.Y. Tsien, and W.W. Webb, Molecular spectroscopy and dynamics of intrinsically fluorescent proteins: coral red (dsRed) and yellow (Citrine). *Proc Natl Acad Sci U S A* 97 (2000) 11996-2001.
